# Supplementary material for: Bisphenol S is present in culture media used for ART and cell culture
Source: PubMed Central journal article supplement — Hum Reprod. 2021 Jan 9;36(4):1032–42. doi: 10.1093/humrep/deaa365 (PMC7970731; doi:10.1093/humrep/deaa365), 2021-01-09
Supplement: deaa365_supplementary_data.pdf [file deaa365_supplementary_data.pdf]

Supplementary Table S1 Bisphenol assessment in cell culture and ART media (in ng/l).

| Sample number | Product type                                | Name                  | Reference number | Batch number | Use        | Bisphenols (BP) |                 |            |          |          |           |            |          |          |          |    |    |
|---------------|---------------------------------------------|-----------------------|------------------|--------------|------------|-----------------|-----------------|------------|----------|----------|-----------|------------|----------|----------|----------|----|----|
|               |                                             |                       |                  |              |            | (LOQ in ng/l)   |                 |            |          |          |           |            |          |          |          |    |    |
|               |                                             |                       |                  |              |            | BPA (10)        | BPS (2)         | BPE (10)   | BPF (5)  | BPAF (5) | BPAP (10) | BPB (5)    | BPC (15) | BPP (10) | BPZ (10) |    |    |
| 18            | Cell culture medium                         | McCoy's 5A Medium     | M8403            | SLCB0586     | RL         | NQ              | <b>74</b>       | NQ         | NQ       | NQ       | NQ        | NQ         | NQ       | NQ       | NQ       | NQ |    |
| 19            |                                             |                       |                  | SLCB7211     |            | NQ              | <b>395</b>      | NQ         | NQ       | 5        | NQ        | NQ         | NQ       | NQ       | NQ       |    |    |
| 20a           | Oocyte retrieval, holding and washing media | Synvitroflush         | 15840125A        | 20250050     | ART        | NQ              | NQ              | NQ         | NQ       | NQ       | NQ        | NQ         | NQ       | NQ       | NQ       | NQ |    |
| 20b           |                                             |                       |                  |              |            | NQ              | NQ              | NQ         | NQ       | NQ       | NQ        | NQ         | NQ       | NQ       | NQ       |    |    |
| 20c           |                                             |                       |                  |              |            | NQ              | NQ              | NQ         | NQ       | NQ       | NQ        | NQ         | NQ       | NQ       | NQ       |    |    |
| 21a           |                                             |                       |                  |              |            | 20150031        | NQ              | NQ         | NQ       | NQ       | NQ        | NQ         | NQ       | NQ       | NQ       | NQ | NQ |
| 21b           |                                             |                       |                  |              |            |                 | NQ              | NQ         | NQ       | NQ       | NQ        | NQ         | NQ       | NQ       | NQ       | NQ |    |
| 21c           |                                             |                       |                  |              |            |                 | NQ              | NQ         | NQ       | NQ       | NQ        | NQ         | NQ       | NQ       | NQ       | NQ |    |
| 22a           |                                             |                       |                  |              |            |                 | Flushing medium | 10840060A  | 20280036 | ART      | NQ        | <b>459</b> | 12       | 16       | NQ       | NQ | NQ |
| 22b           | NQ                                          | <b>457</b>            | 11               | 15           | NQ         | NQ              |                 |            |          |          | NQ        | NQ         | NQ       |          |          |    |    |
| 22c           | NQ                                          | <b>451</b>            | 12               | 14           | NQ         | NQ              |                 |            |          |          | NQ        | NQ         | NQ       |          |          |    |    |
| 23a           | 20040044                                    | 5                     | <b>437</b>       | 27           | NQ         | NQ              |                 |            |          |          | NQ        | NQ         | NQ       | NQ       |          |    |    |
| 23b           |                                             | 6                     | <b>432</b>       | 28           | NQ         | NQ              |                 |            |          |          | NQ        | NQ         | NQ       | NQ       |          |    |    |
| 23c           |                                             | 6                     | <b>441</b>       | 28           | NQ         | NQ              | NQ              | NQ         | NQ       | NQ       |           |            |          |          |          |    |    |
| 24a           | BO-WASH                                     | 61008                 | WASH1704         | BEP          | NQ         | <b>34</b>       | NQ              | 5          | NQ       | NQ       | NQ        | NQ         | NQ       |          |          |    |    |
| 24b           |                                             |                       |                  |              | NQ         | <b>35</b>       | NQ              | 6          | NQ       | NQ       | NQ        | NQ         | NQ       |          |          |    |    |
| 24c           |                                             |                       |                  |              | NQ         | <b>35</b>       | NQ              | 6          | NQ       | NQ       | NQ        | NQ         | NQ       |          |          |    |    |
| 25            |                                             | Medium 199 with Hepes | M7528            | RNBG6724     | BEP        | 28              | <b>308</b>      | 15         | NQ       | NQ       | 14        | NQ         | NQ       | NQ       |          |    |    |
| 26a           | IVM media                                   | BO-IVM                | 61002            | IVM1701N     | BEP        | 30              | <b>53</b>       | NQ         | 15       | NQ       | 16        | NQ         | NQ       | NQ       | NQ       |    |    |
| 26b           |                                             |                       |                  |              |            | 26              | <b>51</b>       | NQ         | 17       | NQ       | 15        | NQ         | NQ       | NQ       | NQ       |    |    |
| 26c           |                                             |                       |                  |              |            | 27              | <b>54</b>       | NQ         | 20       | NQ       | 16        | NQ         | NQ       | NQ       | NQ       |    |    |
| 27a           | BO-HEPES-IVM                                | 61009                 | IVMH1602N        | BEP          | <b>154</b> | <b>25</b>       | NQ              | NQ         | NQ       | NQ       | NQ        | NQ         | NQ       | NQ       |          |    |    |
| 27b           |                                             |                       |                  |              | <b>159</b> | <b>23</b>       | NQ              | NQ         | NQ       | NQ       | NQ        | NQ         | NQ       |          |          |    |    |
| 27c           |                                             |                       |                  |              | <b>152</b> | <b>23</b>       | NQ              | NQ         | NQ       | NQ       | NQ        | NQ         | NQ       |          |          |    |    |
| 28a           | Sperm preparation and IVF media             | BO-IVF                | 61003            | IVF1702N     | BEP        | <b>61</b>       | <b>111</b>      | <b>101</b> | NQ       | NQ       | 35        | NQ         | NQ       | NQ       | NQ       |    |    |
| 28b           |                                             |                       |                  |              |            | <b>64</b>       | <b>110</b>      | <b>90</b>  | NQ       | NQ       | 38        | NQ         | NQ       | NQ       | NQ       |    |    |
| 28c           |                                             |                       |                  |              |            | <b>62</b>       | <b>116</b>      | <b>99</b>  | NQ       | NQ       | 41        | NQ         | NQ       | NQ       | NQ       |    |    |
| 29a           | Gradient 40/80                              | 84022060 A            | 20110060         | ART          | NQ         | <b>69</b>       | NQ              | NQ         | NQ       | NQ       | NQ        | NQ         | NQ       | NQ       |          |    |    |
| 29b           |                                             |                       |                  |              | NQ         | <b>65</b>       | NQ              | NQ         | NQ       | NQ       | NQ        | NQ         | NQ       |          |          |    |    |
| 29c           |                                             |                       |                  |              | NQ         | <b>66</b>       | NQ              | NQ         | NQ       | NQ       | NQ        | NQ         | NQ       |          |          |    |    |
| 30a           |                                             |                       |                  |              | 20180042   | NQ              | <b>22</b>       | NQ         | NQ       | NQ       | NQ        | NQ         | NQ       | NQ       |          |    |    |
| 30b           |                                             |                       |                  |              |            | NQ              | <b>19</b>       | NQ         | NQ       | NQ       | NQ        | NQ         | NQ       | NQ       |          |    |    |
| 30c           |                                             |                       |                  |              |            | NQ              | <b>22</b>       | NQ         | NQ       | NQ       | NQ        | NQ         | NQ       | NQ       |          |    |    |
| 31a           | Sequential Fert                             | 83010060A             | 20190042         | ART          | NQ         | NQ              | NQ              | NQ         | NQ       | NQ       | NQ        | NQ         | NQ       | NQ       |          |    |    |
| 31b           |                                             |                       |                  |              | NQ         | NQ              | NQ              | NQ         | NQ       | NQ       | NQ        | NQ         | NQ       |          |          |    |    |
| 31c           |                                             |                       |                  |              | NQ         | NQ              | NQ              | NQ         | NQ       | NQ       | NQ        | NQ         | NQ       |          |          |    |    |
| 32a           |                                             |                       |                  |              | 20220035   | NQ              | NQ              | NQ         | NQ       | NQ       | NQ        | NQ         | NQ       | NQ       |          |    |    |
| 32b           |                                             |                       |                  |              |            | NQ              | NQ              | NQ         | NQ       | NQ       | NQ        | NQ         | NQ       | NQ       |          |    |    |
| 32c           |                                             |                       |                  |              |            | NQ              | NQ              | NQ         | NQ       | NQ       | NQ        | NQ         | NQ       | NQ       |          |    |    |
| 33a           | Universal IVF medium                        | 10310060 A            | 20270017         | ART          | NQ         | <b>799</b>      | 18              | 21         | 9        | NQ       | NQ        | NQ         | NQ       | NQ       |          |    |    |
| 33b           |                                             |                       |                  |              | NQ         | <b>728</b>      | 19              | 23         | 11       | NQ       | NQ        | NQ         | NQ       | NQ       |          |    |    |

(continued)

Supplementary Table S1 Continued

| Sample number | Product type                      | Name                     | Reference number | Batch number | Use              | Bisphenols (BP) |             |            |         |            |           |         |          |          |          |
|---------------|-----------------------------------|--------------------------|------------------|--------------|------------------|-----------------|-------------|------------|---------|------------|-----------|---------|----------|----------|----------|
|               |                                   |                          |                  |              |                  | (LOQ in ng/l)   |             |            |         |            |           |         |          |          |          |
|               |                                   |                          |                  |              |                  | BPA (10)        | BPS (2)     | BPE (10)   | BPF (5) | BPAF (5)   | BPAP (10) | BPB (5) | BPC (15) | BPP (10) | BPZ (10) |
| 33c           |                                   |                          |                  |              |                  | NQ              | <b>724</b>  | 17         | 18      | 9          | NQ        | NQ      | NQ       | NQ       | NQ       |
| 34            | In vitro development media        | SAGE I-step              | 67010010A        | 19370063     | ART              | NQ              | <b>283</b>  | 16         | NQ      | NQ         | NQ        | NQ      | NQ       | NQ       | NQ       |
| 35            |                                   |                          |                  | 19290061     |                  | 12              | <b>394</b>  | 18         | NQ      | 11         | NQ        | NQ      | NQ       | NQ       | NQ       |
| 36a           |                                   |                          |                  | 20270046     |                  | NQ              | <b>342</b>  | NQ         | 11      | NQ         | NQ        | NQ      | NQ       | NQ       | NQ       |
| 36b           |                                   |                          |                  |              |                  | NQ              | <b>333</b>  | NQ         | 10      | NQ         | NQ        | NQ      | NQ       | NQ       | NQ       |
| 36c           |                                   |                          |                  |              |                  | NQ              | <b>336</b>  | NQ         | 7       | NQ         | NQ        | NQ      | NQ       | NQ       | NQ       |
| 37a           |                                   |                          |                  |              | Sequential Cleav | 83040010A       | 20320064    | ART        | 20      | <b>174</b> | 4         | 6       | 6        | NQ       | NQ       |
| 37b           |                                   |                          |                  |              |                  | 18              | <b>187</b>  | 9          | 9       | 8          | NQ        | NQ      | NQ       | NQ       |          |
| 37c           |                                   |                          |                  |              |                  | 18              | <b>175</b>  | 7          | 10      | 8          | NQ        | NQ      | NQ       | NQ       |          |
| 38a           |                                   | Sequential Blast         | 83060010A        | 20330063     | ART              | 3               | <b>146</b>  | NQ         | 3       | 5          | NQ        | NQ      | NQ       | NQ       |          |
| 38b           |                                   |                          |                  |              |                  | 3               | <b>212</b>  | NQ         | 2       | 5          | NQ        | NQ      | NQ       | NQ       |          |
| 38c           |                                   |                          |                  |              |                  | 5               | <b>202</b>  | NQ         | 4       | 4          | NQ        | NQ      | NQ       | NQ       |          |
| 39a           |                                   | Global                   | LGGG-020         | LGGG-200824U | ART              | NQ              | 11          | NQ         | NQ      | NQ         | NQ        | NQ      | NQ       | NQ       |          |
| 39b           |                                   |                          |                  |              |                  | NQ              | 11          | NQ         | NQ      | NQ         | NQ        | NQ      | NQ       | NQ       |          |
| 39c           |                                   |                          |                  |              |                  | NQ              | 10          | NQ         | NQ      | NQ         | NQ        | NQ      | NQ       | NQ       |          |
| 40a           |                                   | BO-IVC                   | 61001            | IVC1703N     | BEP              | 40              | <b>326</b>  | <b>129</b> | 27      | NQ         | 18        | NQ      | NQ       | NQ       |          |
| 40b           |                                   |                          |                  |              |                  | 27              | <b>313</b>  | <b>117</b> | 27      | NQ         | 16        | NQ      | NQ       | NQ       |          |
| 40c           |                                   |                          |                  |              |                  | 35              | <b>326</b>  | <b>110</b> | 20      | NQ         | 16        | NQ      | NQ       | NQ       |          |
| 41            |                                   | Medium 199–100 ml bottle | M4530            | RNBH8521     | BEP              | NQ              | <b>278</b>  | 16         | 5       | NQ         | NQ        | NQ      | NQ       | NQ       |          |
| 42a           |                                   |                          |                  | RNBG5443     |                  | NQ              | <b>1228</b> | 38         | 17      | NQ         | NQ        | NQ      | NQ       | NQ       |          |
| 42b           |                                   |                          |                  |              |                  | NQ              | <b>1140</b> | 21         | 23      | NQ         | NQ        | NQ      | NQ       | NQ       |          |
| 42c           |                                   |                          |                  |              |                  | NQ              | <b>1210</b> | 23         | 14      | NQ         | NQ        | NQ      | NQ       | NQ       |          |
| 42d           |                                   |                          |                  |              |                  | NQ              | <b>1172</b> | 23         | 17      | NQ         | NQ        | NQ      | NQ       | NQ       |          |
| 43            |                                   |                          |                  | RNBG5443     |                  | NQ              | <b>1693</b> | 33         | 16      | NQ         | NQ        | NQ      | NQ       | NQ       |          |
| 44            |                                   |                          |                  | RNBG5443     |                  | NQ              | <b>1220</b> | 21         | 18      | NQ         | NQ        | NQ      | NQ       | NQ       |          |
| 45            |                                   |                          |                  | RNBH6994     |                  | NQ              | <b>233</b>  | NQ         | NQ      | NQ         | NQ        | NQ      | NQ       | NQ       |          |
| 46a           | Embryo washing and handling media | Global with HEPES        | LGGH-050         | LGGH-200820C | ART              | NQ              | 5           | NQ         | NQ      | NQ         | NQ        | NQ      | NQ       | NQ       |          |
| 46b           |                                   |                          |                  |              |                  | NQ              | 5           | NQ         | NQ      | NQ         | NQ        | NQ      | NQ       |          |          |
| 46c           |                                   |                          |                  |              |                  | NQ              | 5           | NQ         | NQ      | NQ         | NQ        | NQ      | NQ       |          |          |

LOQ, limit of quantification, mentioned below each bisphenols between brackets; RL, research laboratory; BEP, bovine embryo production; NQ, not quantifiable; each sample number corresponds to a separate vial; bold text: significant difference with the controls  $P < 0.0001$ , non-parametric one-way ANOVA with the Tukey *post hoc* test were performed.

Supplementary Table SII Bisphenol assessment in cell culture and ART media (in nM).

| Sample number | Product type                                | Name          | Reference number | Batch number | Use         | Bisphenols (nM) |             |             |      |      |      |     |     |     |     |    |    |
|---------------|---------------------------------------------|---------------|------------------|--------------|-------------|-----------------|-------------|-------------|------|------|------|-----|-----|-----|-----|----|----|
|               |                                             |               |                  |              |             | BPA             | BPS         | BPE         | BPF  | BPAF | BPAP | BPB | BPC | BPP | BPZ |    |    |
| 18            | Cell culture medium                         | McCoy's 5A    | M8403            | SLCB0586     | RL          | NQ              | <b>0.30</b> | NQ          | NQ   | NQ   | NQ   | NQ  | NQ  | NQ  | NQ  |    |    |
| 19            |                                             | Medium        |                  | SLCB7211     |             | NQ              | <b>1.58</b> | NQ          | NQ   | 0.01 | NQ   | NQ  | NQ  | NQ  | NQ  |    |    |
| 20a           | Oocyte retrieval, holding and washing media | Synvitroflush | 15840125A        | 20250050     | ART         | NQ              | NQ          | NQ          | NQ   | NQ   | NQ   | NQ  | NQ  | NQ  | NQ  |    |    |
| 20b           |                                             |               |                  |              |             | NQ              | NQ          | NQ          | NQ   | NQ   | NQ   | NQ  | NQ  | NQ  | NQ  |    |    |
| 20c           |                                             |               |                  |              |             | NQ              | NQ          | NQ          | NQ   | NQ   | NQ   | NQ  | NQ  | NQ  | NQ  | NQ |    |
| 21a           |                                             |               |                  |              |             |                 | 20150031    | NQ          | NQ   | NQ   | NQ   | NQ  | NQ  | NQ  | NQ  | NQ | NQ |
| 21b           |                                             |               |                  |              |             |                 |             | NQ          | NQ   | NQ   | NQ   | NQ  | NQ  | NQ  | NQ  | NQ | NQ |
| 21c           |                                             |               |                  |              |             |                 |             | NQ          | NQ   | NQ   | NQ   | NQ  | NQ  | NQ  | NQ  | NQ | NQ |
| 22a           | Flushing medium                             | 10840060A     | 20280036         | ART          | NQ          | <b>1.83</b>     | 0.06        | 0.08        | NQ   | NQ   | NQ   | NQ  | NQ  | NQ  |     |    |    |
| 22b           |                                             |               |                  |              | NQ          | <b>1.83</b>     | 0.05        | 0.07        | NQ   | NQ   | NQ   | NQ  | NQ  | NQ  |     |    |    |
| 22c           |                                             |               |                  |              | NQ          | <b>1.80</b>     | 0.06        | 0.07        | NQ   | NQ   | NQ   | NQ  | NQ  | NQ  |     |    |    |
| 23a           |                                             |               |                  |              |             | 20040044        | 0.02        | <b>1.74</b> | 0.13 | NQ   | NQ   | NQ  | NQ  | NQ  | NQ  |    |    |
| 23b           |                                             |               |                  |              |             |                 | 0.03        | <b>1.72</b> | 0.13 | NQ   | NQ   | NQ  | NQ  | NQ  | NQ  |    |    |
| 23c           |                                             |               |                  |              |             |                 | 0.02        | <b>1.76</b> | 0.13 | NQ   | NQ   | NQ  | NQ  | NQ  | NQ  |    |    |
| 24a           | BO-WASH                                     | 61008         | WASH1704         | BEP          | NQ          | <b>0.14</b>     | NQ          | 0.03        | NQ   | NQ   | NQ   | NQ  | NQ  | NQ  |     |    |    |
| 24b           |                                             |               |                  |              | NQ          | <b>0.14</b>     | NQ          | 0.03        | NQ   | NQ   | NQ   | NQ  | NQ  | NQ  |     |    |    |
| 24c           |                                             |               |                  |              | NQ          | <b>0.14</b>     | NQ          | 0.03        | NQ   | NQ   | NQ   | NQ  | NQ  | NQ  |     |    |    |
| 25            | Medium 199 with Hepes                       | M7528         | RNBG6724         | BEP          | 0.12        | <b>1.23</b>     | 0.07        | NQ          | NQ   | 0.05 | NQ   | NQ  | NQ  | NQ  |     |    |    |
| 26a           | IVM media                                   | BO-IVM        | 61002            | IVM1701N     | BEP         | 0.13            | <b>0.21</b> | NQ          | 0.08 | NQ   | 0.06 | NQ  | NQ  | NQ  |     |    |    |
| 26b           |                                             |               |                  |              |             | 0.11            | <b>0.20</b> | NQ          | 0.08 | NQ   | 0.05 | NQ  | NQ  | NQ  | NQ  |    |    |
| 26c           |                                             |               |                  |              |             | 0.12            | <b>0.21</b> | NQ          | 0.10 | NQ   | 0.06 | NQ  | NQ  | NQ  | NQ  |    |    |
| 27a           | BO-HEPES-IVM                                | 61009         | IVMH1602N        | BEP          | <b>0.67</b> | <b>0.10</b>     | NQ          | NQ          | NQ   | NQ   | NQ   | NQ  | NQ  |     |     |    |    |
| 27b           |                                             |               |                  |              | <b>0.69</b> | <b>0.09</b>     | NQ          | NQ          | NQ   | NQ   | NQ   | NQ  | NQ  |     |     |    |    |
| 27c           |                                             |               |                  |              | <b>0.67</b> | <b>0.09</b>     | NQ          | NQ          | NQ   | NQ   | NQ   | NQ  | NQ  |     |     |    |    |
| 28a           | Sperm preparation and IVF media             | BO-IVF        | 61003            | IVF1702N     | BEP         | <b>0.27</b>     | <b>0.44</b> | <b>0.47</b> | NQ   | NQ   | 0.12 | NQ  | NQ  | NQ  |     |    |    |
| 28b           |                                             |               |                  |              |             | <b>0.28</b>     | <b>0.44</b> | <b>0.42</b> | NQ   | NQ   | 0.13 | NQ  | NQ  | NQ  |     |    |    |
| 28c           |                                             |               |                  |              |             | <b>0.27</b>     | <b>0.46</b> | <b>0.46</b> | NQ   | NQ   | 0.14 | NQ  | NQ  | NQ  |     |    |    |
| 29a           | Gradient 40/80                              | 84022060A     | 20110060         | ART          | NQ          | <b>0.28</b>     | NQ          | NQ          | NQ   | NQ   | NQ   | NQ  | NQ  |     |     |    |    |
| 29b           |                                             |               |                  |              | NQ          | <b>0.26</b>     | NQ          | NQ          | NQ   | NQ   | NQ   | NQ  | NQ  |     |     |    |    |
| 29c           |                                             |               |                  |              | NQ          | <b>0.27</b>     | NQ          | NQ          | NQ   | NQ   | NQ   | NQ  | NQ  |     |     |    |    |
| 30a           |                                             |               |                  |              |             | 20180042        | NQ          | <b>0.09</b> | NQ   | NQ   | NQ   | NQ  | NQ  | NQ  |     |    |    |
| 30b           |                                             |               |                  |              |             |                 | NQ          | <b>0.08</b> | NQ   | NQ   | NQ   | NQ  | NQ  | NQ  |     |    |    |
| 30c           |                                             |               |                  |              |             |                 | NQ          | <b>0.09</b> | NQ   | NQ   | NQ   | NQ  | NQ  | NQ  |     |    |    |
| 31a           | Sequential Fert                             | 83010060A     | 20190042         | ART          | NQ          | NQ              | NQ          | NQ          | NQ   | NQ   | NQ   | NQ  | NQ  |     |     |    |    |
| 31b           |                                             |               |                  |              | NQ          | NQ              | NQ          | NQ          | NQ   | NQ   | NQ   | NQ  | NQ  |     |     |    |    |
| 31c           |                                             |               |                  |              | NQ          | NQ              | NQ          | NQ          | NQ   | NQ   | NQ   | NQ  | NQ  |     |     |    |    |
| 32a           |                                             |               |                  |              |             | 20220035        | NQ          | NQ          | NQ   | NQ   | NQ   | NQ  | NQ  | NQ  |     |    |    |
| 32b           |                                             |               |                  |              |             |                 | NQ          | NQ          | NQ   | NQ   | NQ   | NQ  | NQ  | NQ  |     |    |    |
| 32c           |                                             |               |                  |              |             |                 | NQ          | NQ          | NQ   | NQ   | NQ   | NQ  | NQ  | NQ  |     |    |    |
| 33a           | Universal IVF medium                        | 10310060A     | 20270017         | ART          | NQ          | <b>3.19</b>     | 0.09        | 0.10        | 0.03 | NQ   | NQ   | NQ  | NQ  |     |     |    |    |
| 33b           |                                             |               |                  |              | NQ          | <b>2.91</b>     | 0.09        | 0.11        | 0.03 | NQ   | NQ   | NQ  | NQ  |     |     |    |    |

(continued)

**Supplementary Table SII Continued**

| Sample number | Product type                      | Name                     | Reference number | Batch number | Use | Bisphenols (nM) |             |             |      |      |      |     |     |     |     |
|---------------|-----------------------------------|--------------------------|------------------|--------------|-----|-----------------|-------------|-------------|------|------|------|-----|-----|-----|-----|
|               |                                   |                          |                  |              |     | BPA             | BPS         | BPE         | BPF  | BPAF | BPAP | BPB | BPC | BPP | BPZ |
| 33c           |                                   |                          |                  |              |     | NQ              | <b>2.89</b> | 0.08        | 0.09 | 0.03 | NQ   | NQ  | NQ  | NQ  | NQ  |
| 34            | In vitro development media        | SAGE I-step              | 67010010A        | 19370063     | ART | NQ              | <b>1.13</b> | 0.07        | NQ   | NQ   | NQ   | NQ  | NQ  | NQ  | NQ  |
| 35            |                                   |                          |                  | 19290061     |     | 0.05            | <b>1.57</b> | 0.08        | NQ   | 0.03 | NQ   | NQ  | NQ  | NQ  | NQ  |
| 36a           |                                   |                          |                  | 20270046     |     | NQ              | <b>1.37</b> | NQ          | 0.06 | NQ   | NQ   | NQ  | NQ  | NQ  | NQ  |
| 36b           |                                   |                          |                  |              |     | NQ              | <b>1.33</b> | NQ          | 0.05 | NQ   | NQ   | NQ  | NQ  | NQ  | NQ  |
| 36c           |                                   |                          |                  |              |     | NQ              | <b>1.34</b> | NQ          | 0.03 | NQ   | NQ   | NQ  | NQ  | NQ  | NQ  |
| 37a           |                                   | Sequential Cleav         | 83040010A        | 20320064     | ART | 0.09            | <b>0.70</b> | 0.02        | 0.03 | 0.02 | NQ   | NQ  | NQ  | NQ  | NQ  |
| 37b           |                                   |                          |                  | 0.08         |     | <b>0.75</b>     | 0.04        | 0.05        | 0.02 | NQ   | NQ   | NQ  | NQ  | NQ  |     |
| 37c           |                                   |                          |                  | 0.08         |     | <b>0.70</b>     | 0.03        | 0.05        | 0.02 | NQ   | NQ   | NQ  | NQ  | NQ  |     |
| 38a           |                                   | Sequential Blast         | 83060010A        | 20330063     | ART | 0.01            | <b>0.58</b> | NQ          | 0.01 | 0.01 | NQ   | NQ  | NQ  | NQ  | NQ  |
| 38b           |                                   |                          |                  | 0.01         |     | <b>0.85</b>     | NQ          | 0.01        | 0.01 | NQ   | NQ   | NQ  | NQ  | NQ  |     |
| 38c           |                                   |                          |                  | 0.02         |     | <b>0.81</b>     | NQ          | 0.02        | 0.01 | NQ   | NQ   | NQ  | NQ  | NQ  |     |
| 39a           |                                   | Global                   | LGGG-020         | LGGG-200824U | ART | NQ              | <b>0.04</b> | NQ          | NQ   | NQ   | NQ   | NQ  | NQ  | NQ  | NQ  |
| 39b           |                                   |                          |                  |              |     | NQ              | <b>0.04</b> | NQ          | NQ   | NQ   | NQ   | NQ  | NQ  | NQ  | NQ  |
| 39c           |                                   |                          |                  |              |     | NQ              | <b>0.04</b> | NQ          | NQ   | NQ   | NQ   | NQ  | NQ  | NQ  | NQ  |
| 40a           |                                   | BO-IVC                   | 61001            | IVC1703N     | BEP | 0.17            | <b>1.30</b> | <b>0.60</b> | 0.14 | NQ   | 0.06 | NQ  | NQ  | NQ  | NQ  |
| 40b           |                                   |                          |                  |              |     | 0.12            | <b>1.25</b> | <b>0.54</b> | 0.14 | NQ   | 0.05 | NQ  | NQ  | NQ  | NQ  |
| 40c           |                                   |                          |                  |              |     | 0.15            | <b>1.30</b> | <b>0.51</b> | 0.10 | NQ   | 0.06 | NQ  | NQ  | NQ  | NQ  |
| 41            |                                   | Medium 199–100 ml bottle | M4530            | RNBH8521     | BEP | NQ              | <b>1.11</b> | 0.07        | 0.02 | NQ   | NQ   | NQ  | NQ  | NQ  | NQ  |
| 42a           |                                   |                          |                  | RNBG5443     |     | NQ              | <b>4.91</b> | 0.18        | 0.08 | NQ   | NQ   | NQ  | NQ  | NQ  | NQ  |
| 42b           |                                   |                          |                  |              |     | NQ              | <b>4.55</b> | 0.10        | 0.11 | NQ   | NQ   | NQ  | NQ  | NQ  | NQ  |
| 42c           |                                   |                          |                  |              |     | NQ              | <b>4.83</b> | 0.11        | 0.07 | NQ   | NQ   | NQ  | NQ  | NQ  | NQ  |
| 42d           |                                   |                          |                  |              |     | NQ              | <b>4.68</b> | 0.11        | 0.08 | NQ   | NQ   | NQ  | NQ  | NQ  | NQ  |
| 43            |                                   |                          |                  | RNBG5443     | NQ  | <b>6.76</b>     | 0.15        | 0.08        | NQ   | NQ   | NQ   | NQ  | NQ  | NQ  |     |
| 44            |                                   |                          |                  | RNBG5443     | NQ  | <b>4.87</b>     | 0.10        | 0.09        | NQ   | NQ   | NQ   | NQ  | NQ  | NQ  |     |
| 45            |                                   |                          |                  | RNBH6994     | NQ  | <b>0.93</b>     | NQ          | NQ          | NQ   | NQ   | NQ   | NQ  | NQ  | NQ  |     |
| 46a           | Embryo washing and handling media | Global with HEPES        | LGGH-050         | LGGH-200820C | ART | NQ              | 0.02        | NQ          | NQ   | NQ   | NQ   | NQ  | NQ  | NQ  | NQ  |
| 46b           |                                   |                          |                  |              |     | NQ              | 0.02        | NQ          | NQ   | NQ   | NQ   | NQ  | NQ  | NQ  | NQ  |
| 46c           |                                   |                          |                  |              |     | NQ              | 0.02        | NQ          | NQ   | NQ   | NQ   | NQ  | NQ  | NQ  | NQ  |

Each sample number corresponds to a separate vial; bold text: significant difference with the controls  $P < 0.0001$ , non-parametric one-way ANOVA with the Tukey *post hoc* test was performed.
